# Supplementary material
Source: PubMed Central journal article supplement (PMC3684857)

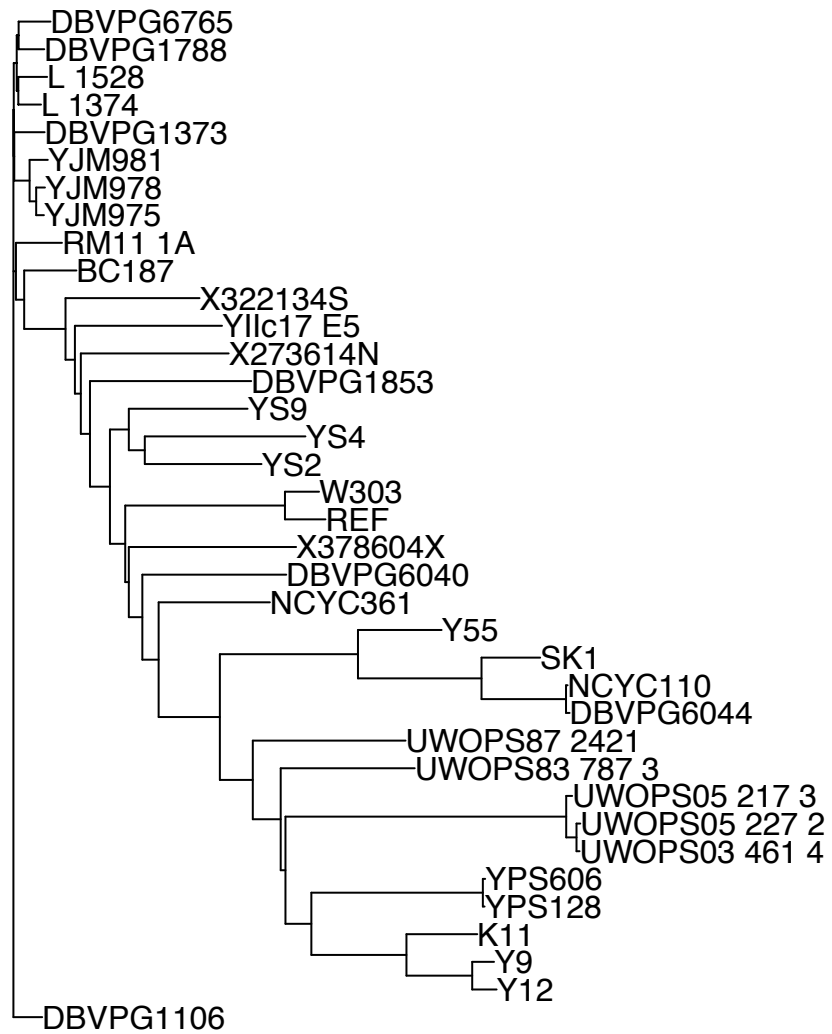

Supplement: supp_mst073_Figure_S1.pdf [file supp_mst073_Figure_S1.pdf]

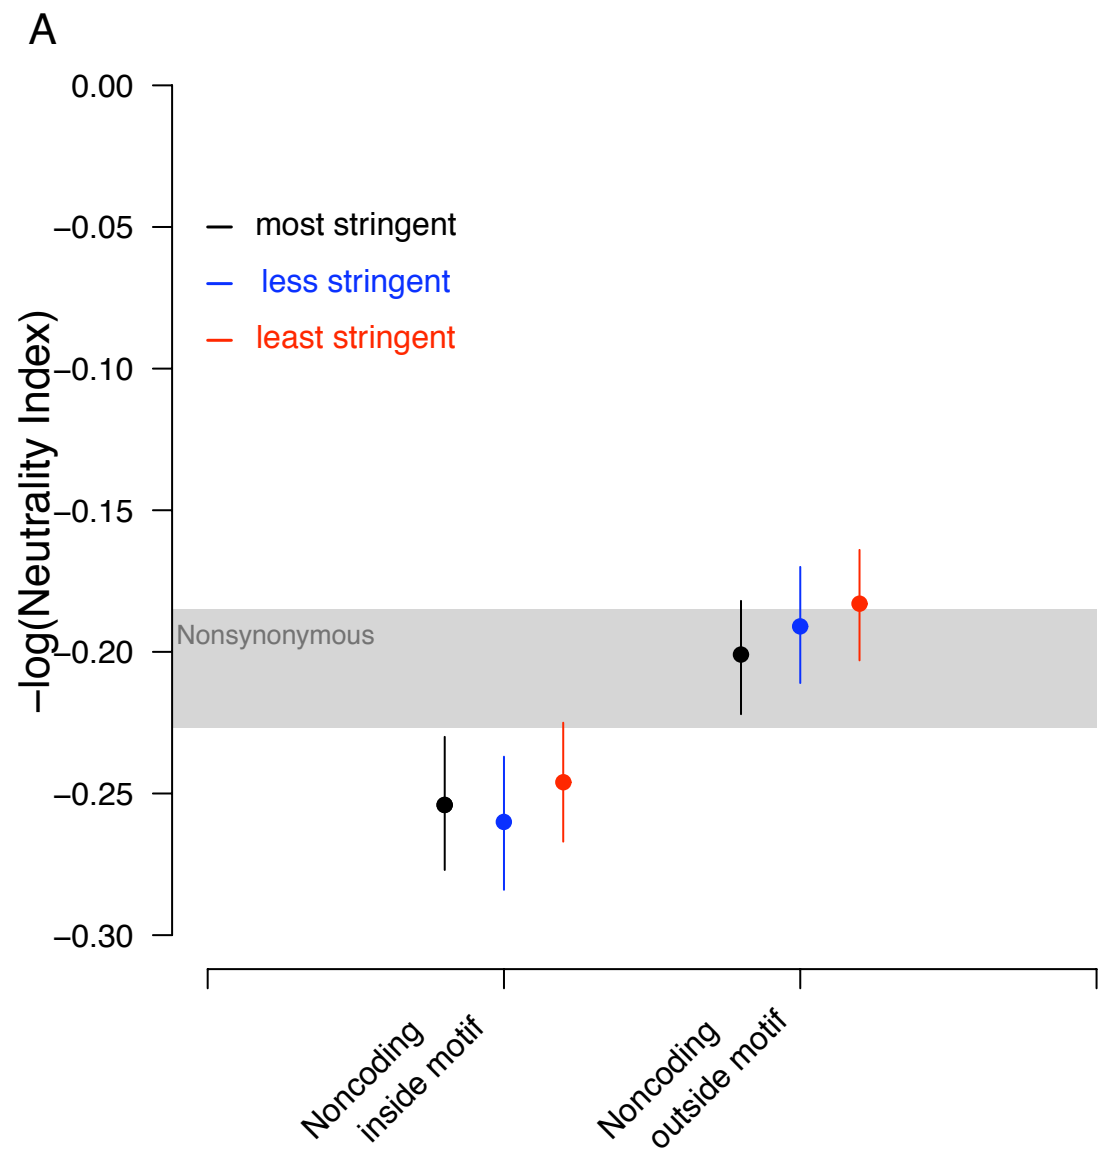

Supplement: supp_mst073_Figure_S2.pdf [file supp_mst073_Figure_S2.pdf]
